# Supplementary material
Source: PubMed Central journal article supplement (PMC7038236)
Supplement: AAC.02005-19-s0001.pdf [file AAC.02005-19-s0001.pdf]

**Supplemental Material for**  
**Equations to predict antimicrobial minimum inhibitory concentrations in *Neisseria gonorrhoeae* using molecular antimicrobial resistance determinants**

Walter Demczuk<sup>a#</sup>, Irene Martin<sup>a</sup>, Pam Sawatzky<sup>a</sup>, Vanessa Allen<sup>c</sup>, Brigitte Lefebvre<sup>d</sup>, Linda Hoang<sup>e</sup>, Prenilla Naidu<sup>f</sup>, Jessica Minion<sup>g</sup>, Paul VanCaesele<sup>h</sup>, David Haldane<sup>i</sup>, David W Eyre<sup>j,k,l</sup> and Michael R Mulvey<sup>a</sup>

<sup>a</sup> National Microbiology Laboratory, Public Health Agency of Canada, Winnipeg, Manitoba

<sup>c</sup> Public Health Ontario Laboratories, Toronto, Ontario

<sup>d</sup> Laboratoire de santé publique du Québec, Ste-Anne-de-Bellevue, Québec

<sup>e</sup> British Columbia Centres for Disease Control Public Health Microbiology & Reference Laboratory, Vancouver, British Columbia

<sup>f</sup> Provincial Laboratory for Public Health, Edmonton, Alberta

<sup>g</sup> Saskatchewan Disease Control Laboratory, Regina, Saskatchewan

<sup>h</sup> Cadham Provincial Laboratory, Winnipeg, Manitoba

<sup>i</sup> Queen Elizabeth II Health Sciences Centre, Halifax, Nova Scotia

<sup>j</sup> Nuffield Department of Medicine, University of Oxford, Oxford, UK

<sup>k</sup> National Institute for Health Research Biomedical Research Centre, Oxford, UK

<sup>l</sup> Oxford National Institute for Health Research Health Protection Research Unit, UK

## Regression Statistics Summary Output for Minimum Inhibitory Concentration

### Azithromycin:

| SUMMARY OUTPUT               |                     |                       |               |                |                       |                  |                    |                    |
|------------------------------|---------------------|-----------------------|---------------|----------------|-----------------------|------------------|--------------------|--------------------|
| <i>Regression Statistics</i> |                     |                       |               |                |                       |                  |                    |                    |
| Multiple R                   | 0.912571074         |                       |               |                |                       |                  |                    |                    |
| R Square                     | 0.832785966         |                       |               |                |                       |                  |                    |                    |
| Adjusted R Square            | 0.831468282         |                       |               |                |                       |                  |                    |                    |
| Standard Error               | 0.904006021         |                       |               |                |                       |                  |                    |                    |
| Observations                 | 1280                |                       |               |                |                       |                  |                    |                    |
| ANOVA                        |                     |                       |               |                |                       |                  |                    |                    |
|                              | <i>df</i>           | <i>SS</i>             | <i>MS</i>     | <i>F</i>       | <i>Significance F</i> |                  |                    |                    |
| Regression                   | 10                  | 5164.935956           | 516.4935956   | 632.007591     | 0                     |                  |                    |                    |
| Residual                     | 1269                | 1037.060919           | 0.817226886   |                |                       |                  |                    |                    |
| Total                        | 1279                | 6201.996875           |               |                |                       |                  |                    |                    |
|                              | <i>Coefficients</i> | <i>Standard Error</i> | <i>t Stat</i> | <i>P-value</i> | <i>Lower 95%</i>      | <i>Upper 95%</i> | <i>Lower 95.0%</i> | <i>Upper 95.0%</i> |
| Intercept                    | -2.890086354        | 0.072154294           | -40.05425288  | 1.8877E-227    | -3.031641184          | -2.748531524     | -3.031641184       | -2.748531524       |
| A2059G                       | 2.331226536         | 0.130836023           | 17.81792566   | 1.47584E-63    | 2.074547828           | 2.587905245      | 2.074547828        | 2.587905245        |
| C2611T                       | 1.27220139          | 0.018446871           | 68.96569958   | 0              | 1.23601167            | 1.308391111      | 1.23601167         | 1.308391111        |
| mtrRp_MEN                    | 3.471268969         | 0.12556345            | 27.64553679   | 4.5488E-132    | 3.224934181           | 3.717603757      | 3.224934181        | 3.717603757        |
| mtrRp_WHO-P                  | 4.890086354         | 0.906880989           | 5.39220296    | 8.2928E-08     | 3.110935361           | 6.669237347      | 3.110935361        | 6.669237347        |
| mtrRp-35Adel                 | 0.800905933         | 0.111706116           | 7.169759015   | 1.27211E-12    | 0.581756949           | 1.020054917      | 0.581756949        | 1.020054917        |
| ermB                         | 2.377380977         | 0.523120193           | 4.5446171     | 6.02824E-06    | 1.351105398           | 3.403656555      | 1.351105398        | 3.403656555        |
| ermC                         | 2.99993045          | 0.407562028           | 7.360825682   | 3.2746E-13     | 2.200423536           | 3.799562555      | 2.200423536        | 3.799562555        |
| A39T                         | 0.407755716         | 0.091639867           | 4.449545044   | 9.35958E-06    | 0.227973405           | 0.587538027      | 0.227973405        | 0.587538027        |
| G120                         | 0.515960534         | 0.090180374           | 5.721428193   | 1.31642E-08    | 0.339041507           | 0.69287956       | 0.339041507        | 0.69287956         |
| PonA                         | 0.248313741         | 0.131083082           | 1.894323335   | 0.058409301    | -0.008849656          | 0.505477138      | -0.008849656       | 0.505477138        |

### Ceftriaxone:

| SUMMARY OUTPUT               |                     |                       |               |                |                       |                  |                    |                    |
|------------------------------|---------------------|-----------------------|---------------|----------------|-----------------------|------------------|--------------------|--------------------|
| <i>Regression Statistics</i> |                     |                       |               |                |                       |                  |                    |                    |
| Multiple R                   | 0.850114165         |                       |               |                |                       |                  |                    |                    |
| R Square                     | 0.722694093         |                       |               |                |                       |                  |                    |                    |
| Adjusted R Square            | 0.720508861         |                       |               |                |                       |                  |                    |                    |
| Standard Error               | 0.874808164         |                       |               |                |                       |                  |                    |                    |
| Observations                 | 1280                |                       |               |                |                       |                  |                    |                    |
| ANOVA                        |                     |                       |               |                |                       |                  |                    |                    |
|                              | <i>df</i>           | <i>SS</i>             | <i>MS</i>     | <i>F</i>       | <i>Significance F</i> |                  |                    |                    |
| Regression                   | 10                  | 2530.944724           | 253.0944724   | 330.7173702    | 0                     |                  |                    |                    |
| Residual                     | 1269                | 971.152151            | 0.765289323   |                |                       |                  |                    |                    |
| Total                        | 1279                | 3502.096875           |               |                |                       |                  |                    |                    |
|                              | <i>Coefficients</i> | <i>Standard Error</i> | <i>t Stat</i> | <i>P-value</i> | <i>Lower 95%</i>      | <i>Upper 95%</i> | <i>Lower 95.0%</i> | <i>Upper 95.0%</i> |
| Intercept                    | -7.724745216        | 0.134676559           | -57.35775584  | 0              | -7.988958423          | -7.460532009     | -7.988958423       | -7.460532009       |
| mtrRp                        | 0.542682422         | 0.111445641           | 4.869480912   | 1.25971E-06    | 0.324044447           | 0.761320396      | 0.324044447        | 0.761320396        |
| G120                         | 1.382201381         | 0.091623779           | 15.08561855   | 2.01127E-47    | 1.202450632           | 1.561952131      | 1.202450632        | 1.561952131        |
| PonA                         | 0.66860446          | 0.1033138             | 6.471589107   | 1.38198E-10    | 0.465919818           | 0.871289103      | 0.465919818        | 0.871289103        |
| A311V                        | 3.897943187         | 0.439658734           | 8.865838168   | 2.51852E-18    | 3.035405232           | 4.760481142      | 3.035405232        | 4.760481142        |
| A501P                        | 5.147943187         | 0.620179114           | 8.300736144   | 2.61983E-16    | 3.931254008           | 6.364632367      | 3.931254008        | 6.364632367        |
| A501T                        | 1.510010557         | 0.10561549            | 14.29724513   | 4.18578E-43    | 1.302810376           | 1.717210737      | 1.302810376        | 1.717210737        |
| A501V                        | 1.919370464         | 0.145339094           | 13.20615401   | 2.09724E-37    | 1.634239122           | 2.204501807      | 1.634239122        | 2.204501807        |
| N513Y                        | 1.525996187         | 0.157950078           | 9.661256334   | 2.34409E-21    | 1.216124175           | 1.8358682        | 1.216124175        | 1.8358682          |
| A517G                        | 0.431053201         | 0.140721237           | 3.063170916   | 0.00223617     | 0.154981333           | 0.707125069      | 0.154981333        | 0.707125069        |
| G543S                        | 0.48482054          | 0.120385949           | 4.027218672   | 5.97871E-05    | 0.248643156           | 0.720997925      | 0.248643156        | 0.720997925        |

**Cefixime:**

| SUMMARY OUTPUT               |                     |                       |               |                |                       |                  |                    |                    |
|------------------------------|---------------------|-----------------------|---------------|----------------|-----------------------|------------------|--------------------|--------------------|
| <b>Regression Statistics</b> |                     |                       |               |                |                       |                  |                    |                    |
| Multiple R                   | 0.885873957         |                       |               |                |                       |                  |                    |                    |
| R Square                     | 0.784772667         |                       |               |                |                       |                  |                    |                    |
| Adjusted R Square            | 0.783247434         |                       |               |                |                       |                  |                    |                    |
| Standard Error               | 0.843085111         |                       |               |                |                       |                  |                    |                    |
| Observations                 | 1280                |                       |               |                |                       |                  |                    |                    |
| <b>ANOVA</b>                 |                     |                       |               |                |                       |                  |                    |                    |
|                              | <i>df</i>           | <i>SS</i>             | <i>MS</i>     | <i>F</i>       | <i>Significance F</i> |                  |                    |                    |
| Regression                   | 9                   | 3291.49352            | 365.7215022   | 514.5263913    | 0                     |                  |                    |                    |
| Residual                     | 1270                | 902.7064805           | 0.710792504   |                |                       |                  |                    |                    |
| Total                        | 1279                | 4194.2                |               |                |                       |                  |                    |                    |
|                              | <i>Coefficients</i> | <i>Standard Error</i> | <i>t Stat</i> | <i>P-value</i> | <i>Lower 95%</i>      | <i>Upper 95%</i> | <i>Lower 95.0%</i> | <i>Upper 95.0%</i> |
| Intercept                    | -7.206527476        | 0.129646504           | -55.58597621  | 0              | -7.460872352          | -6.952182601     | -7.460872352       | -6.952182601       |
| mtrRp                        | 0.471042012         | 0.106313355           | 4.430694657   | 1.0202E-05     | 0.262472894           | 0.679611131      | 0.262472894        | 0.679611131        |
| G120                         | 0.746248259         | 0.086810231           | 8.596316932   | 2.38327E-17    | 0.575941025           | 0.916555493      | 0.575941025        | 0.916555493        |
| PonA                         | 0.626881856         | 0.0934459             | 6.708500399   | 2.95335E-11    | 0.443556544           | 0.810207169      | 0.443556544        | 0.810207169        |
| A311V                        | 4.165679716         | 0.423715402           | 9.831315296   | 4.92955E-22    | 3.334420575           | 4.996938857      | 3.334420575        | 4.996938857        |
| A501P                        | 4.915679716         | 0.597689609           | 8.22469097    | 4.80149E-16    | 3.74311212            | 6.088247312      | 3.74311212         | 6.088247312        |
| A501T                        | 1.668616209         | 0.101779675           | 16.39439521   | 6.11213E-55    | 1.468941417           | 1.868291001      | 1.468941417        | 1.868291001        |
| A501V                        | 1.715947477         | 0.138857039           | 12.35765569   | 3.29548E-33    | 1.443533063           | 1.98836189       | 1.443533063        | 1.98836189         |
| N513Y                        | 2.917717645         | 0.151559022           | 19.25136228   | 1.14278E-72    | 2.620384053           | 3.215051237      | 2.620384053        | 3.215051237        |
| A517G                        | 0.468354066         | 0.135363329           | 3.459977445   | 0.000558128    | 0.202793729           | 0.733914402      | 0.202793729        | 0.733914402        |

| SUMMARY OUTPUT with PenA G543S |                     |                       |               |                  |                       |                  |                    |                    |
|--------------------------------|---------------------|-----------------------|---------------|------------------|-----------------------|------------------|--------------------|--------------------|
| <b>Regression Statistics</b>   |                     |                       |               |                  |                       |                  |                    |                    |
| Multiple R                     | 0.877050576         |                       |               |                  |                       |                  |                    |                    |
| R Square                       | 0.769217713         |                       |               |                  |                       |                  |                    |                    |
| Adjusted R Square              | 0.767399097         |                       |               |                  |                       |                  |                    |                    |
| Standard Error                 | 0.87807236          |                       |               |                  |                       |                  |                    |                    |
| Observations                   | 1280                |                       |               |                  |                       |                  |                    |                    |
| <b>ANOVA</b>                   |                     |                       |               |                  |                       |                  |                    |                    |
|                                | <i>df</i>           | <i>SS</i>             | <i>MS</i>     | <i>F</i>         | <i>Significance F</i> |                  |                    |                    |
| Regression                     | 10                  | 3261.136954           | 326.1136954   | 422.9688894      | 0                     |                  |                    |                    |
| Residual                       | 1269                | 978.4130461           | 0.771011069   |                  |                       |                  |                    |                    |
| Total                          | 1279                | 4239.55               |               |                  |                       |                  |                    |                    |
|                                | <i>Coefficients</i> | <i>Standard Error</i> | <i>t Stat</i> | <i>P-value</i>   | <i>Lower 95%</i>      | <i>Upper 95%</i> | <i>Lower 95.0%</i> | <i>Upper 95.0%</i> |
| Intercept                      | -7.197072591        | 0.135179082           | -53.24102289  | 0                | -7.462271664          | -6.931873518     | -7.462271664       | -6.931873518       |
| mtrRp                          | 0.437118519         | 0.111861481           | 3.907676839   | 9.81053E-05      | 0.217664735           | 0.656572304      | 0.217664735        | 0.656572304        |
| G120                           | 0.752337077         | 0.091965657           | 8.180630665   | 6.79384E-16      | 0.571915619           | 0.932758535      | 0.571915619        | 0.932758535        |
| PonA                           | 0.579678911         | 0.103699297           | 5.589998448   | 2.77698E-08      | 0.376237985           | 0.783119836      | 0.376237985        | 0.783119836        |
| A311V                          | 4.166221344         | 0.441299245           | 9.440807775   | 1.70687E-20      | 3.300464978           | 5.031977711      | 3.300464978        | 5.031977711        |
| A501P                          | 4.916221344         | 0.622493205           | 7.89763053    | 6.11481E-15      | 3.694992299           | 6.13745039       | 3.694992299        | 6.13745039         |
| A501T                          | 1.666653611         | 0.106009576           | 15.72172691   | 5.05391E-51      | 1.458680298           | 1.874626923      | 1.458680298        | 1.874626923        |
| A501V                          | 1.726996669         | 0.145881402           | 11.83836077   | 9.59264E-31      | 1.440801408           | 2.013191931      | 1.440801408        | 2.013191931        |
| N513Y                          | 2.948835259         | 0.158539441           | 18.60001044   | 1.78294E-68      | 2.637807012           | 3.259863506      | 2.637807012        | 3.259863506        |
| A517G                          | 0.485867603         | 0.141246314           | 3.439860402   | 0.000600903      | 0.208765621           | 0.762969586      | 0.208765621        | 0.762969586        |
| G543S                          | <b>0.078856846</b>  | 0.120835148           | 0.652598578   | <b>0.5141333</b> | -0.158201794          | 0.315915486      | -0.158201794       | 0.315915486        |

## Penicillin:

| SUMMARY OUTPUT               |                     |                       |               |                |                       |                  |                    |                    |
|------------------------------|---------------------|-----------------------|---------------|----------------|-----------------------|------------------|--------------------|--------------------|
| <b>Regression Statistics</b> |                     |                       |               |                |                       |                  |                    |                    |
| Multiple R                   | 0.849371619         |                       |               |                |                       |                  |                    |                    |
| R Square                     | 0.721432147         |                       |               |                |                       |                  |                    |                    |
| Adjusted R Square            | 0.719899147         |                       |               |                |                       |                  |                    |                    |
| Standard Error               | 0.925191894         |                       |               |                |                       |                  |                    |                    |
| Observations                 | 1280                |                       |               |                |                       |                  |                    |                    |
| <b>ANOVA</b>                 |                     |                       |               |                |                       |                  |                    |                    |
|                              | <i>df</i>           | <i>SS</i>             | <i>MS</i>     | <i>F</i>       | <i>Significance F</i> |                  |                    |                    |
| Regression                   | 7                   | 2819.780107           | 402.8257295   | 470.6017783    | 0                     |                  |                    |                    |
| Residual                     | 1272                | 1088.806612           | 0.855980041   |                |                       |                  |                    |                    |
| Total                        | 1279                | 3908.586719           |               |                |                       |                  |                    |                    |
|                              | <i>Coefficients</i> | <i>Standard Error</i> | <i>t Stat</i> | <i>P-value</i> | <i>Lower 95%</i>      | <i>Upper 95%</i> | <i>Lower 95.0%</i> | <i>Upper 95.0%</i> |
| Intercept                    | -3.209433456        | 0.142203918           | -22.56923367  | 3.93324E-95    | -3.488413472          | -2.930453441     | -3.488413472       | -2.930453441       |
| BLA                          | 6.418951823         | 0.221493268           | 28.98034724   | 3.2813E-142    | 5.984419524           | 6.853484121      | 5.984419524        | 6.853484121        |
| mtrRp                        | 0.555074097         | 0.116567359           | 4.761831274   | 2.13843E-06    | 0.32638867            | 0.783759524      | 0.32638867         | 0.783759524        |
| G120                         | 1.344048816         | 0.095451395           | 14.08097614   | 5.90251E-42    | 1.156789336           | 1.531308295      | 1.156789336        | 1.531308295        |
| PonA                         | 1.552610243         | 0.103631731           | 14.98199655   | 7.44755E-47    | 1.349302328           | 1.755918157      | 1.349302328        | 1.755918157        |
| N513Y                        | 1.251924894         | 0.162426392           | 7.707644526   | 2.56908E-14    | 0.933271807           | 1.570577981      | 0.933271807        | 1.570577981        |
| A517G                        | 1.281946706         | 0.148595614           | 8.627083093   | 1.84637E-17    | 0.990427266           | 1.573466146      | 0.990427266        | 1.573466146        |
| G543S                        | 0.423741809         | 0.126216471           | 3.357262387   | 0.000810444    | 0.176126459           | 0.671357159      | 0.176126459        | 0.671357159        |

## Tetracycline:

| SUMMARY OUTPUT               |                     |                       |               |                |                       |                  |                    |                    |
|------------------------------|---------------------|-----------------------|---------------|----------------|-----------------------|------------------|--------------------|--------------------|
| <b>Regression Statistics</b> |                     |                       |               |                |                       |                  |                    |                    |
| Multiple R                   | 0.901716464         |                       |               |                |                       |                  |                    |                    |
| R Square                     | 0.813092581         |                       |               |                |                       |                  |                    |                    |
| Adjusted R Square            | 0.812211635         |                       |               |                |                       |                  |                    |                    |
| Standard Error               | 0.631487689         |                       |               |                |                       |                  |                    |                    |
| Observations                 | 1280                |                       |               |                |                       |                  |                    |                    |
| <b>ANOVA</b>                 |                     |                       |               |                |                       |                  |                    |                    |
|                              | <i>df</i>           | <i>SS</i>             | <i>MS</i>     | <i>F</i>       | <i>Significance F</i> |                  |                    |                    |
| Regression                   | 6                   | 2208.368978           | 368.0614964   | 922.9764312    | 0                     |                  |                    |                    |
| Residual                     | 1273                | 507.6427405           | 0.398776701   |                |                       |                  |                    |                    |
| Total                        | 1279                | 2716.011719           |               |                |                       |                  |                    |                    |
|                              | <i>Coefficients</i> | <i>Standard Error</i> | <i>t Stat</i> | <i>P-value</i> | <i>Lower 95%</i>      | <i>Upper 95%</i> | <i>Lower 95.0%</i> | <i>Upper 95.0%</i> |
| Intercept                    | -1.833248054        | 0.099078415           | -18.50300146  | 6.99436E-68    | -2.027622986          | -1.638873121     | -2.027622986       | -1.638873121       |
| mtrRp_any                    | 0.621336661         | 0.062148679           | 9.997584377   | 1.04676E-22    | 0.499411565           | 0.743261757      | 0.499411565        | 0.743261757        |
| A39T                         | 0.259050797         | 0.067096569           | 3.86086506    | 0.00011866     | 0.127418786           | 0.390682809      | 0.127418786        | 0.390682809        |
| G120                         | 0.791012164         | 0.070867662           | 11.16182114   | 1.15019E-27    | 0.651981912           | 0.930042416      | 0.651981912        | 0.930042416        |
| A121                         | 0.215288647         | 0.068146387           | 3.159208528   | 0.001619211    | 0.081597071           | 0.348980222      | 0.081597071        | 0.348980222        |
| rpsl                         | 2.105844696         | 0.105474898           | 19.96536359   | 2.27288E-77    | 1.898920955           | 2.312768437      | 1.898920955        | 2.312768437        |
| tetM                         | 4.145844561         | 0.076445116           | 54.23295554   | 0              | 3.995872296           | 4.295816825      | 3.995872296        | 4.295816825        |

## Ciprofloxacin:

| SUMMARY OUTPUT               |                     |                       |               |                |                       |                  |                    |                    |
|------------------------------|---------------------|-----------------------|---------------|----------------|-----------------------|------------------|--------------------|--------------------|
| <b>Regression Statistics</b> |                     |                       |               |                |                       |                  |                    |                    |
| Multiple R                   | 0.989617131         |                       |               |                |                       |                  |                    |                    |
| R Square                     | 0.979342065         |                       |               |                |                       |                  |                    |                    |
| Adjusted R Square            | 0.979212039         |                       |               |                |                       |                  |                    |                    |
| Standard Error               | 0.771396358         |                       |               |                |                       |                  |                    |                    |
| Observations                 | 1280                |                       |               |                |                       |                  |                    |                    |
| <b>ANOVA</b>                 |                     |                       |               |                |                       |                  |                    |                    |
|                              | <i>df</i>           | <i>SS</i>             | <i>MS</i>     | <i>F</i>       | <i>Significance F</i> |                  |                    |                    |
| Regression                   | 8                   | 35854.87597           | 4481.859497   | 7531.874409    | 0                     |                  |                    |                    |
| Residual                     | 1271                | 756.311525            | 0.595052341   |                |                       |                  |                    |                    |
| Total                        | 1279                | 36611.1875            |               |                |                       |                  |                    |                    |
|                              | <i>Coefficients</i> | <i>Standard Error</i> | <i>t Stat</i> | <i>P-value</i> | <i>Lower 95%</i>      | <i>Upper 95%</i> | <i>Lower 95.0%</i> | <i>Upper 95.0%</i> |
| Intercept                    | -7.62037037         | 0.037113825           | -205.3243087  | 0              | -7.693181466          | -7.547559275     | -7.693181466       | -7.547559275       |
| gyrA_S91                     | 5.672781223         | 0.163127483           | 34.7751411    | 9.5789E-187    | 5.352752476           | 5.99280997       | 5.352752476        | 5.99280997         |
| parC_D86                     | 5.053736657         | 0.166034613           | 30.43785003   | 2.693E-153     | 4.728004607           | 5.379468706      | 4.728004607        | 5.379468706        |
| parC_S87R                    | 5.670663624         | 0.162921984           | 34.8060065    | 5.5239E-187    | 5.351038031           | 5.990289216      | 5.351038031        | 5.990289216        |
| parC_S87I                    | 4.184154983         | 0.403908729           | 10.3591596    | 3.38283E-24    | 3.391753836           | 4.97655613       | 3.391753836        | 4.97655613         |
| parC_S87C                    | 5.947589147         | 0.787582047           | 7.551707371   | 8.17121E-14    | 4.402485333           | 7.492692962      | 4.402485333        | 7.492692962        |
| parC_S87N                    | 1.785524064         | 0.292332664           | 6.107850019   | 1.33988E-09    | 1.212016434           | 2.359031695      | 1.212016434        | 2.359031695        |
| parC_S88                     | 1.446590318         | 0.128468186           | 11.26030003   | 4.19652E-28    | 1.194557295           | 1.69862334       | 1.194557295        | 1.69862334         |
| parC_E91                     | 5.432173554         | 0.176082982           | 30.85007697   | 1.87E-156      | 5.086728291           | 5.777618817      | 5.086728291        | 5.777618817        |

| SUMMARY OUTPUT with GyrA D95 |                     |                       |               |                    |                       |                  |                    |                    |
|------------------------------|---------------------|-----------------------|---------------|--------------------|-----------------------|------------------|--------------------|--------------------|
| <b>Regression Statistics</b> |                     |                       |               |                    |                       |                  |                    |                    |
| Multiple R                   | 0.989617789         |                       |               |                    |                       |                  |                    |                    |
| R Square                     | 0.979343368         |                       |               |                    |                       |                  |                    |                    |
| Adjusted R Square            | 0.979196982         |                       |               |                    |                       |                  |                    |                    |
| Standard Error               | 0.771675665         |                       |               |                    |                       |                  |                    |                    |
| Observations                 | 1280                |                       |               |                    |                       |                  |                    |                    |
| <b>ANOVA</b>                 |                     |                       |               |                    |                       |                  |                    |                    |
|                              | <i>df</i>           | <i>SS</i>             | <i>MS</i>     | <i>F</i>           | <i>Significance F</i> |                  |                    |                    |
| Regression                   | 9                   | 35854.92367           | 3983.880408   | 6690.162751        | 0                     |                  |                    |                    |
| Residual                     | 1270                | 756.2638318           | 0.595483332   |                    |                       |                  |                    |                    |
| Total                        | 1279                | 36611.1875            |               |                    |                       |                  |                    |                    |
|                              | <i>Coefficients</i> | <i>Standard Error</i> | <i>t Stat</i> | <i>P-value</i>     | <i>Lower 95%</i>      | <i>Upper 95%</i> | <i>Lower 95.0%</i> | <i>Upper 95.0%</i> |
| Intercept                    | -7.62037037         | 0.037127263           | -205.2499917  | 0                  | -7.693207884          | -7.547532856     | -7.693207884       | -7.547532856       |
| gyrA_S91                     | 5.62037037          | 0.24683348            | 22.76988669   | 1.61383E-96        | 5.136124139           | 6.104616601      | 5.136124139        | 6.104616601        |
| parC_D86                     | 5.015269925         | 0.214621544           | 23.36797058   | 9.4948E-101        | 4.594218155           | 5.436321695      | 4.594218155        | 5.436321695        |
| parC_S87R                    | 5.63207592          | 0.212495013           | 26.50450868   | 1.4277E-123        | 5.215196049           | 6.04895579       | 5.215196049        | 6.04895579         |
| parC_S87I                    | 4.155183702         | 0.41682143            | 9.968738181   | 1.3766E-22         | 3.337449388           | 4.972918015      | 3.337449388        | 4.972918015        |
| parC_S87C                    | 5.909001183         | 0.799578846           | 7.390141963   | 2.6505E-13         | 4.340360484           | 7.477641882      | 4.340360484        | 7.477641882        |
| parC_S87N                    | 1.761094274         | 0.304912983           | 5.775727408   | 9.62529E-09        | 1.162905718           | 2.35928283       | 1.162905718        | 2.35928283         |
| parC_S88                     | 1.446586956         | 0.128514702           | 11.25619817   | 4.38767E-28        | 1.194462486           | 1.698711425      | 1.194462486        | 1.698711425        |
| parC_E91                     | 5.394418424         | 0.220964709           | 24.41303162   | 3.0487E-108        | 4.960922419           | 5.827914428      | 4.960922419        | 5.827914428        |
| gyrA_D95                     | <b>0.090998817</b>  | 0.321545226           | 0.283004722   | <b>0.777219338</b> | -0.539819432          | 0.721817066      | -0.539819432       | 0.721817066        |

**Table S1. Ciprofloxacin predicted and phenotypic MIC correlation on Canadian validation dataset**

| Predicted MIC (mg/L) | Phenotypic MIC (mg/L) |       |       |       |       |              |      |     |           |    |     |     |     |    |    |      | Total |
|----------------------|-----------------------|-------|-------|-------|-------|--------------|------|-----|-----------|----|-----|-----|-----|----|----|------|-------|
|                      | Susceptible           |       |       |       |       | Intermediate |      |     | Resistant |    |     |     |     |    |    |      |       |
|                      | 0.002                 | 0.004 | 0.008 | 0.016 | 0.032 | 0.125        | 0.25 | 0.5 | 1         | 2  | 4   | 8   | 16  | 32 | 64 |      |       |
| ≤0.004               | 8                     | 166   | 11    | 18    | 2     |              |      |     |           |    |     |     |     |    |    | 205  |       |
| 0.25                 |                       | 3     |       | 1     |       | 10           | 26   | 3   |           |    |     |     |     |    |    | 44   |       |
| 1                    |                       |       |       |       |       |              |      |     | 1         | 3  |     |     |     |    |    | 4    |       |
| 8                    |                       |       |       |       |       |              |      | 1   |           | 15 | 196 | 303 | 161 | 1  |    | 677  |       |
| 16                   |                       |       |       |       |       |              |      |     |           | 5  | 55  | 81  | 9   | 2  |    | 152  |       |
| 32                   |                       |       |       |       |       |              |      |     |           |    | 3   | 2   | 7   | 1  |    | 13   |       |
| Total                | 8                     | 169   | 11    | 19    | 2     | 10           | 26   | 4   | 1         | 24 | 254 | 384 | 172 | 10 | 1  | 1095 |       |

Dark green highlight indicates matching MIC values; light green highlight indicates matching MIC values within +/- 1 dilution; yellow highlight indicates matching MIC values within 2 dilutions.

**Table S2. Ceftriaxone predicted and phenotypic MIC correlation on Canadian validation dataset**

| Predicted MIC (mg/L) | Phenotypic MIC (mg/L) |       |       |       |       |       |       |       | Total |
|----------------------|-----------------------|-------|-------|-------|-------|-------|-------|-------|-------|
|                      | 0.001                 | 0.002 | 0.004 | 0.008 | 0.016 | 0.032 | 0.063 | 0.125 |       |
| ≤0.004               | 17                    | 5     | 3     | 4     |       |       |       |       | 29    |
| 0.008                |                       | 5     | 85    | 103   | 22    | 3     |       |       | 218   |
| 0.016                |                       |       | 8     | 103   | 39    | 11    | 4     |       | 165   |
| 0.031                |                       |       |       | 28    | 377   | 210   | 22    |       | 637   |
| 0.063                |                       |       |       |       | 7     | 23    | 6     | 6     | 42    |
| 0.125                |                       |       |       |       |       |       | 2     | 2     | 4     |
| Total                | 17                    | 10    | 96    | 238   | 445   | 247   | 34    | 8     | 1095  |

Dark green highlight indicates matching MIC values; light green highlight indicates matching MIC values within +/- 1 dilution; yellow highlight indicates matching MIC values within 2 dilutions. CLSI resistance breakpoint ≥0.5 mg/L.

**Table S3. Cefixime predicted and phenotypic MIC correlation on Canadian validation dataset**

| Predicted MIC (mg/L) | Phenotypic MIC (mg/L) |       |       |       |       |       |       |      |     |      | Total |
|----------------------|-----------------------|-------|-------|-------|-------|-------|-------|------|-----|------|-------|
|                      | 0.002                 | 0.004 | 0.008 | 0.016 | 0.032 | 0.063 | 0.125 | 0.25 | 0.5 |      |       |
| ≤0.008               | 14                    | 22    | 92    | 26    | 3     |       | 3     |      |     | 160  |       |
| 0.016                |                       | 6     | 143   | 492   | 167   | 15    |       |      |     | 823  |       |
| 0.031                |                       |       | 5     | 3     | 1     |       |       |      |     | 9    |       |
| 0.063                |                       |       |       | 7     | 6     | 20    | 28    | 1    |     | 62   |       |
| 0.125                |                       |       |       |       | 5     | 16    | 10    | 7    | 3   | 41   |       |
| Total                | 14                    | 28    | 240   | 528   | 182   | 54    | 38    | 8    | 3   | 1095 |       |

Dark green highlight indicates matching MIC values; light green highlight indicates matching MIC values within +/- 1 dilution; yellow highlight indicates matching MIC values within 2 dilutions. CLSI resistance breakpoint ≥1 mg/L.

**Table S4. Tetracycline predicted and phenotypic MIC correlation on Canadian validation dataset**

| Predicted MIC (mg/L) | Phenotypic MIC (mg/L) |      |              |     |     |           |   |    |    |    |      | Total |
|----------------------|-----------------------|------|--------------|-----|-----|-----------|---|----|----|----|------|-------|
|                      | Susceptible           |      | Intermediate |     |     | Resistant |   |    |    |    |      |       |
|                      | 0.125                 | 0.25 | 0.5          | 1   | 2   | 4         | 8 | 16 | 32 | 64 |      |       |
| ≤0.25                | 1                     | 19   | 9            |     |     |           |   |    |    |    | 29   |       |
| 0.5                  |                       | 5    | 14           | 1   |     |           |   |    |    |    | 20   |       |
| 1                    |                       | 1    | 6            | 56  | 27  |           |   |    |    |    | 90   |       |
| 2                    |                       |      | 17           | 85  | 73  | 10        |   |    |    |    | 185  |       |
| 4                    |                       |      |              | 2   | 279 | 384       | 6 |    |    |    | 671  |       |
| 16                   |                       |      |              |     |     |           |   | 2  |    |    | 2    |       |
| 32                   |                       |      |              |     |     |           |   | 10 | 85 | 3  | 98   |       |
| Total                | 1                     | 25   | 46           | 144 | 379 | 394       | 6 | 10 | 87 | 3  | 1095 |       |

Dark green highlight indicates matching MIC values; light green highlight indicates matching MIC values within +/- 1 dilution; yellow highlight indicates matching MIC values within 2 dilutions.

**Table S5. Penicillin predicted and phenotypic MIC correlation on Canadian validation dataset**

| Predicted MIC (mg/L) | Phenotypic MIC (mg/L) |       |              |      |     |     |           |   |   |    |    |    |     | Total |
|----------------------|-----------------------|-------|--------------|------|-----|-----|-----------|---|---|----|----|----|-----|-------|
|                      | Susceptible           |       | Intermediate |      |     |     | Resistant |   |   |    |    |    |     |       |
|                      | 0.032                 | 0.063 | 0.125        | 0.25 | 0.5 | 1   | 2         | 4 | 8 | 16 | 32 | 64 | 128 |       |
| ≤0.125               | 16                    | 7     | 5            | 1    |     |     |           |   |   |    |    |    |     | 29    |
| 0.25                 |                       | 1     | 54           | 62   | 15  | 2   |           |   |   |    |    |    |     | 134   |
| 0.5                  |                       |       | 2            | 39   | 25  | 2   |           |   |   |    |    |    |     | 68    |
| 1                    |                       | 2     | 3            | 36   | 291 | 377 | 77        | 1 |   |    |    |    |     | 787   |
| 2                    |                       |       |              | 6    | 27  | 15  | 18        | 4 |   |    |    |    |     | 70    |
| 32                   |                       |       |              |      |     |     |           | 1 |   |    |    |    |     | 3     |
| 64                   |                       |       |              |      |     |     |           |   | 1 |    | 1  | 1  | 1   | 4     |
| Total                | 16                    | 10    | 64           | 144  | 358 | 396 | 95        | 6 | 1 | 1  | 1  | 1  | 2   | 1095  |

Dark green highlight indicates matching MIC values; light green highlight indicates matching MIC values within +/- 1 dilution; yellow highlight indicates matching MIC values within 2 dilutions.

**Table S6. Azithromycin predicted and phenotypic MIC correlation on Canadian validation dataset**

| Predicted MIC (mg/L) | Phenotypic MIC (mg/L) |       |       |       |      |     |    |           |    |    |    |    |    |     |     |       |      | Total |
|----------------------|-----------------------|-------|-------|-------|------|-----|----|-----------|----|----|----|----|----|-----|-----|-------|------|-------|
|                      | Susceptible           |       |       |       |      |     |    | Resistant |    |    |    |    |    |     |     |       |      |       |
|                      | 0.016                 | 0.032 | 0.063 | 0.125 | 0.25 | 0.5 | 1  | 2         | 4  | 8  | 16 | 32 | 64 | 128 | 256 | >=512 |      |       |
| ≤0.125               |                       | 6     | 21    | 72    | 17   | 1   | 2  |           |    |    |    |    |    |     |     |       | 119  |       |
| 0.25                 | 1                     | 11    | 55    | 74    | 81   | 21  |    | 1         |    |    |    |    |    |     |     |       | 244  |       |
| 1                    |                       |       |       |       |      |     |    | 1         |    |    |    |    |    |     |     |       | 1    |       |
| 2                    |                       | 2     |       |       |      |     |    | 585       | 21 | 1  |    |    |    |     |     |       | 690  |       |
| 4                    |                       |       |       |       |      |     |    | 5         | 3  |    |    |    |    |     |     |       | 9    |       |
| 8                    |                       |       |       |       |      |     |    |           | 2  | 8  |    |    |    |     |     |       | 10   |       |
| 16                   |                       |       |       |       |      |     |    |           |    |    | 1  |    |    |     |     |       | 10   |       |
| 32                   |                       |       |       |       |      |     |    | 2         | 4  | 3  | 2  | 3  |    |     |     |       | 5    |       |
| 64                   |                       |       |       |       |      |     |    |           |    |    | 1  | 5  |    |     |     |       | 6    |       |
| >=512                |                       |       |       |       |      |     |    |           |    |    |    |    |    |     |     | 1     | 1    |       |
| Total                | 1                     | 19    | 76    | 146   | 98   | 34  | 71 | 595       | 30 | 12 | 4  | 8  | 0  | 0   | 0   | 1     | 1095 |       |

Dark green highlight indicates matching MIC values; light green highlight indicates matching MIC values within +/- 1 dilution; yellow highlight indicates matching MIC values within 2 dilutions.

**Table S7. Ciprofloxacin predicted and phenotypic MIC correlation on International UK/USA validation dataset**

| Predicted MIC (mg/L) | Phenotypic MIC (mg/L) |       |       |      |              |       |      |           |   |    |    | Total |     |     |     |
|----------------------|-----------------------|-------|-------|------|--------------|-------|------|-----------|---|----|----|-------|-----|-----|-----|
|                      | Susceptible           |       |       |      | Intermediate |       |      | Resistant |   |    |    |       |     |     |     |
|                      | 0.004                 | 0.008 | 0.015 | 0.03 | 0.063        | 0.125 | 0.25 | 0.5       | 1 | 2  | 4  | 8     | 16  | 32  |     |
| ≤0.016               |                       |       | 136   | 23   |              |       |      |           |   |    |    |       |     |     | 159 |
| 0.25                 |                       |       |       |      |              | 1     |      |           |   |    | 5  | 3     |     |     | 9   |
| 1                    |                       |       |       |      |              |       |      |           | 4 | 4  |    |       |     |     | 12  |
| 4                    |                       |       |       |      |              |       |      |           |   |    | 3  |       |     |     | 2   |
| 8                    |                       |       |       |      |              |       |      |           |   |    | 2  | 11    | 9   | 1   | 24  |
| 16                   |                       |       | 2     |      |              |       |      | 1         |   |    | 2  | 9     | 28  | 106 | 70  |
| 32                   |                       |       |       |      |              |       |      |           | 2 |    |    | 4     |     | 1   | 5   |
| Total                | 0                     | 0     | 138   | 23   | 0            | 1     | 0    | 1         | 6 | 12 | 17 | 44    | 116 | 73  | 431 |

Dark green highlight indicates matching MIC values; light green highlight indicates matching MIC values within +/- 1 dilution; yellow highlight indicates matching MIC values within 2 dilutions.

**Table S8. Ceftriaxone predicted and phenotypic MIC correlation on International UK/USA validation dataset**

| Predicted MIC (mg/L) | Phenotypic MIC (mg/L) |       |       |      |      |       |      | Total |
|----------------------|-----------------------|-------|-------|------|------|-------|------|-------|
|                      | <=0.004               | 0.008 | 0.015 | 0.03 | 0.06 | 0.125 | 0.25 |       |
| <=0.004              | 29                    |       |       |      |      |       |      | 29    |
| 0.008                | 77                    | 36    | 5     | 3    | 2    |       |      | 123   |
| 0.016                | 28                    | 12    | 7     | 12   | 4    |       |      | 63    |
| 0.031                | 13                    | 16    | 16    | 16   | 13   |       |      | 74    |
| 0.063                |                       | 5     | 16    | 46   | 45   | 21    | 2    | 135   |
| 0.125                |                       |       |       | 1    | 6    |       |      | 7     |
| Total                | 147                   | 69    | 44    | 78   | 70   | 21    | 2    | 431   |

Dark green highlight indicates matching MIC values; light green highlight indicates matching MIC values within +/- 1 dilution; yellow highlight indicates matching MIC values within 2 dilutions.

**Table S9. Cefixime predicted and phenotypic MIC correlation on International UK/USA validation dataset**

| Predicted MIC (mg/L) | Phenotypic MIC (mg/L) |       |       |       |      |      |       |      | Total |
|----------------------|-----------------------|-------|-------|-------|------|------|-------|------|-------|
|                      | 0.002                 | 0.004 | 0.008 | 0.015 | 0.03 | 0.06 | 0.125 | 0.25 |       |
| ≤0.008               | 17                    | 37    | 24    | 22    | 8    | 1    |       |      | 109   |
| 0.016                | 1                     | 6     | 29    | 36    | 11   | 3    |       | 2    | 88    |
| 0.031                | 4                     |       | 12    | 24    | 18   | 12   |       |      | 70    |
| 0.063                | 1                     |       | 2     | 1     | 4    | 12   | 1     | 14   | 35    |
| 0.125                |                       |       | 2     | 1     | 8    | 36   | 71    | 11   | 129   |
| Total                | 23                    | 43    | 67    | 85    | 42   | 36   | 37    | 87   | 431   |

Dark green highlight indicates matching MIC values; light green highlight indicates matching MIC values within +/- 1 dilution; yellow highlight indicates matching MIC values within 2 dilutions. CLSI resistance breakpoint ≥1 mg/L.

**Table S10. Penicillin predicted and phenotypic MIC correlation on International UK/USA validation dataset**

| Predicted MIC (mg/L) | Phenotypic MIC (mg/L) |       |              |      |     |    |           |    |    |    | Total |     |
|----------------------|-----------------------|-------|--------------|------|-----|----|-----------|----|----|----|-------|-----|
|                      | Susceptible           |       | Intermediate |      |     |    | Resistant |    |    |    |       |     |
|                      | 0.016                 | 0.063 | 0.125        | 0.25 | 0.5 | 1  | 2         | 4  | 8  | 16 | 32    |     |
| ≤0.125               | 13                    | 11    | 4            |      | 1   |    |           |    |    |    |       | 29  |
| 0.25                 | 5                     | 10    | 24           | 25   | 16  | 9  |           |    |    |    |       | 89  |
| 0.5                  | 1                     |       | 2            | 11   | 8   |    | 2         |    |    |    |       | 25  |
| 1                    |                       | 2     | 5            | 14   | 12  | 11 | 6         | 1  |    |    |       | 51  |
| 2                    |                       | 1     | 3            | 9    | 27  | 51 | 57        | 49 | 2  |    |       | 199 |
| 32                   |                       |       |              |      |     | 2  | 3         |    |    | 1  | 1     | 10  |
| 64                   |                       |       |              |      |     | 1  | 2         | 2  | 10 |    |       | 15  |
| 256                  |                       |       |              |      |     | 2  | 2         | 2  | 4  | 3  |       | 13  |
| Total                | 19                    | 25    | 38           | 59   | 64  | 76 | 72        | 54 | 19 | 4  | 1     | 431 |

Dark green highlight indicates matching MIC values; light green highlight indicates matching MIC values within +/- 1 dilution; yellow highlight indicates matching MIC values within 2 dilutions.

**Table S11. Azithromycin predicted and phenotypic MIC correlation on International UK/USA validation dataset**

| Predicted MIC (mg/L) | Phenotypic MIC (mg/L) |           |           |           |           |            |           |           |   |           | Total    |          |
|----------------------|-----------------------|-----------|-----------|-----------|-----------|------------|-----------|-----------|---|-----------|----------|----------|
|                      | Susceptible           |           |           |           |           |            |           | Resistant |   |           |          |          |
|                      | 0.015                 | 0.03      | 0.06      | 0.125     | 0.25      | 0.5        | 1         | 2         | 4 | 8         | 16       | 32       |
| ≤0.125               |                       | 6         | 16        | 31        | 20        | 24         | 3         | 2         |   | 1         |          |          |
| 0.25                 | 1                     | 11        | 10        | 49        | 79        | 104        | 53        |           |   |           |          |          |
| 1                    |                       |           |           |           |           |            | 1         | 1         |   | 1         |          |          |
| 2                    |                       |           |           |           |           |            | 1         |           |   |           |          |          |
| 4                    |                       |           |           |           |           |            |           | 1         |   | 3         |          |          |
| 8                    |                       |           |           |           |           |            |           | 1         |   | 2         | 6        |          |
| 64                   |                       |           |           |           |           |            |           |           |   | 3         | 1        |          |
| <b>Total</b>         | <b>1</b>              | <b>17</b> | <b>26</b> | <b>80</b> | <b>99</b> | <b>128</b> | <b>58</b> | <b>5</b>  |   | <b>10</b> | <b>7</b> | <b>4</b> |

Dark green highlight indicates matching MIC values; light green highlight indicates matching MIC values within +/- 1 dilution; yellow highlight indicates matching MIC values within 2 dilutions.

**Table S12. Tetracycline predicted and phenotypic MIC correlation on International UK/USA validation dataset**

| Predicted MIC (mg/L) | Phenotypic MIC (mg/L) |              |           |            |            |           |           |           |           |   | Total      |
|----------------------|-----------------------|--------------|-----------|------------|------------|-----------|-----------|-----------|-----------|---|------------|
|                      | Susceptible           | Intermediate |           | Resistant  |            |           |           |           |           |   |            |
|                      | ≤0.25                 | 0.5          | 1         | 2          | 4          | 8         | 16        | 32        | 64        |   |            |
| ≤0.25                | 22                    | 8            | 4         | 1          |            |           |           |           |           |   | 35         |
| 1                    |                       | 6            | 12        | 19         | 13         | 1         |           |           |           |   | 51         |
| 2                    | 1                     | 7            | 22        | 15         | 24         | 2         |           |           |           |   | 71         |
| 4                    | 2                     | 3            | 5         | 65         | 91         | 63        | 1         |           |           |   | 230        |
| 8                    |                       |              |           |            |            |           | 1         | 1         |           | 4 | 6          |
| 16                   |                       |              |           |            |            |           | 1         |           |           | 1 | 2          |
| 32                   |                       |              |           | 2          |            |           | 5         | 7         | 12        |   | 26         |
| 64                   |                       |              |           |            |            |           | 3         | 3         | 4         |   | 10         |
| <b>Total</b>         | <b>25</b>             | <b>24</b>    | <b>43</b> | <b>100</b> | <b>130</b> | <b>66</b> | <b>11</b> | <b>11</b> | <b>21</b> |   | <b>431</b> |

Dark green highlight indicates matching MIC values; light green highlight indicates matching MIC values within +/- 1 dilution; yellow highlight indicates matching MIC values within 2 dilutions.



Table S13: Correlation between MICs determined by linear regression of molecular antimicrobial resistance determinants and phenotypically determined MICs

| Antimicrobial | Dataset <sup>a</sup> | No. isolates matching MIC dilutions <sup>b</sup> |     |      |      |     |     |    |       | Sensitivity     | Specificity     | MIC interpretive errors <sup>c</sup> |      |       |
|---------------|----------------------|--------------------------------------------------|-----|------|------|-----|-----|----|-------|-----------------|-----------------|--------------------------------------|------|-------|
|               |                      | > -2                                             | -2  | -1   | 0    | +1  | +2  | >2 | % ± 1 |                 |                 | MI                                   | MA   | VMA   |
| Ceftriaxone   | Canada               | 0                                                | 48  | 612  | 363  | 65  | 7   | 0  | 95.0% | NA <sup>d</sup> | 100%            | NA <sup>e</sup>                      | 0    | 0     |
|               | USA                  | 2                                                | 4   | 33   | 88   | 49  | 8   | 2  | 91.4% | NA              | 100%            | NA                                   | 0    | 0     |
|               | UK                   | 16                                               | 57  | 124  | 45   | 2   | 1   | 0  | 69.8% | NA              | 100%            | NA                                   | 0    | 0     |
|               | UK/USA               | 18                                               | 61  | 157  | 133  | 51  | 9   | 2  | 79.1% | NA              | 100%            | NA                                   | 0    | 0     |
|               | Eyre et al.          | NA <sup>f</sup>                                  | NA  | NA   | NA   | NA  | NA  | NA | NA    | NA              | NA              | NA                                   | NA   | NA    |
| Cefixime      | Canada               | 0                                                | 23  | 204  | 615  | 228 | 22  | 3  | 95.6% | NA              | 100%            | NA                                   | 0    | 0     |
|               | USA                  | 1                                                | 0   | 15   | 36   | 96  | 35  | 3  | 79.0% | NA              | 100%            | NA                                   | 0    | 0     |
|               | UK                   | 9                                                | 20  | 104  | 90   | 21  | 1   | 0  | 87.8% | NA              | 100%            | NA                                   | 0    | 0     |
|               | UK/USA               | 10                                               | 20  | 119  | 126  | 117 | 36  | 3  | 84.0% | NA              | 100%            | NA                                   | 0    | 0     |
|               | Eyre et al.          | 5                                                | 17  | 87   | 233  | 76  | 10  | 3  | 91.9% | NA              | 100%            | NA                                   | 0    | 0     |
| Azithromycin  | Canada               | 16                                               | 73  | 187  | 754  | 60  | 2   | 3  | 91.4% | 99.7%           | 81.2%           | NA                                   | 7.7% | 0.2%  |
|               | USA                  | 3                                                | 6   | 5    | 27   | 71  | 68  | 6  | 55.4% | 78.9%           | 100%            | NA                                   | 0    | 2.2%  |
|               | UK                   | 9                                                | 8   | 68   | 87   | 63  | 9   | 1  | 89.9  | 66.7%           | 99.6%           | NA                                   | 0.4% | 0.4%  |
|               | UK/USA               | 12                                               | 14  | 73   | 114  | 134 | 77  | 7  | 74.5% | 77.3%           | 99.8%           | NA                                   | 0.2% | 1.2%  |
|               | Eyre et al.          | 10                                               | 12  | 72   | 183  | 142 | 11  | 1  | 92.1% | 90.9%           | 100%            | NA                                   | 0    | 0.5%  |
| Ciprofloxacin | Canada               | 13                                               | 70  | 297  | 512  | 181 | 19  | 3  | 90.4% | 100%            | 100%            | 0.5%                                 | 0    | 0     |
|               | USA                  | 4                                                | 9   | 17   | 130  | 23  | 1   | 2  | 91.4% | 100%            | 95.6%           | 0.5%                                 | 1.1% | 0     |
|               | UK                   | 3                                                | 5   | 14   | 128  | 83  | 4   | 8  | 91.8% | 100%            | 100%            | 3.3%                                 | 0.8% | 0     |
|               | UK/USA               | 7                                                | 14  | 31   | 258  | 106 | 5   | 10 | 91.7% | 100%            | 98.8%           | 1.9%                                 | 0.5% | 0     |
|               | Eyre et al.          | 15                                               | 14  | 44   | 250  | 106 | 2   | 0  | 92.8% | 100%            | 98.8%           | 0                                    | 0.5% | 0     |
| Tetracycline  | Canada               | 0                                                | 20  | 386  | 631  | 58  | 0   | 0  | 98.2% | 100%            | 100%            | 13.3%                                | 0    | 0     |
|               | USA                  | 6                                                | 15  | 86   | 77   | 2   | 0   | 0  | 88.7% | 100%            | 40%             | 19.4%                                | 1.6% | 0     |
|               | UK                   | 2                                                | 0   | 15   | 75   | 126 | 21  | 6  | 88.2% | 99.4%           | 100%            | 18.8%                                | 0%   | 0.4%  |
|               | UK/USA               | 8                                                | 15  | 101  | 152  | 127 | 22  | 6  | 88.2% | 99.7%           | 88.0%           | 19.0%                                | 0.7% | 0.2%  |
|               | Eyre et al.          | 4                                                | 11  | 78   | 213  | 121 | 3   | 1  | 95.6% | 100%            | 60%             | 7.9%                                 | 0.5% | 0     |
| Penicillin    | Canada               | 13                                               | 67  | 423  | 487  | 101 | 4   | 0  | 92.3% | 100%            | NA <sup>d</sup> | 13.9%                                | 0    | 0     |
|               | USA                  | 14                                               | 5   | 16   | 72   | 65  | 14  | 0  | 82.3% | 100%            | NA              | 13.4%                                | 0    | 0     |
|               | UK                   | 46                                               | 48  | 109  | 34   | 7   | 1   | 0  | 61.2% | 100%            | NA              | 49.8%                                | 0.4% | 0     |
|               | UK/USA               | 60                                               | 53  | 125  | 106  | 72  | 15  | 0  | 70.3% | 100%            | NA              | 34.1%                                | 0.2% | 0     |
|               | Eyre et al.          | 9                                                | 19  | 69   | 204  | 114 | 14  | 2  | 89.8% | 100%            | NA              | 13.0%                                | 0    | 0     |
| Overall       | Canada               | 42                                               | 301 | 2109 | 3362 | 693 | 54  | 9  | 93.8% | 99.9%           | 97.1%           | 4.6%                                 | 1.3% | 0.03% |
|               | USA                  | 30                                               | 39  | 172  | 430  | 306 | 126 | 13 | 81.4% | 99.0%           | 99.2%           | 5.6%                                 | 0.5% | 0.4%  |
|               | UK                   | 85                                               | 138 | 434  | 459  | 302 | 37  | 15 | 81.3% | 99.4%           | 99.8%           | 12.0%                                | 0.3% | 0.1%  |
|               | UK/USA               | 115                                              | 117 | 606  | 889  | 607 | 164 | 28 | 81.3% | 99.2%           | 99.5%           | 9.2%                                 | 0.3% | 0.2%  |
|               | Eyre et al.          | 43                                               | 73  | 350  | 1083 | 559 | 40  | 7  | 92.4% | 99.7%           | 99.5%           | 4.2%                                 | 0.2% | 0.1%  |

<sup>a</sup> Canadian validation dataset (n = 1095) ; international dataset (n=431) with USA (n=186) and UK (n=245) isolates from Eyre et al. 2017; Eyre et al. summarizes predicted MIC values by Eyre et al. 2017.

<sup>b</sup> The number of isolates with MIC<sub>pred</sub> and MIC<sub>pheno</sub> that differ by the number of 2-fold dilutions.

<sup>c</sup> The percentage of isolates with minor (MI), major (ME) and very major (VME) interpretative errors for susceptibilities.

<sup>d</sup> To few isolates available with resistant or susceptible interpretative breakpoints were available to provide meaningful specificity or sensitivity values, respectively.

<sup>e</sup> No CLSI intermediate resistance interpretative breakpoints for these antimicrobials.

<sup>f</sup> Ceftriaxone MIC<sub>pred</sub> not done for the UK/USA international dataset by Eyre et al 2017.

Table S14: Summary of the contributions of each antimicrobial resistance determinant in the linear regression models.

| Antimicrobial | Molecular Determinant | % Contribution | % Error |
|---------------|-----------------------|----------------|---------|
| Ceftriaxone   | mtrRp                 | 3.1%           | 0.6%    |
|               | G120                  | 7.9%           | 0.5%    |
|               | PonA                  | 3.8%           | 0.6%    |
|               | A311V                 | 22.3%          | 2.5%    |
|               | A501P                 | 29.4%          | 3.5%    |
|               | A501T                 | 8.6%           | 0.6%    |
|               | A501V                 | 11.0%          | 0.8%    |
|               | N513Y                 | 8.7%           | 0.9%    |
|               | A517G                 | 2.5%           | 0.8%    |
| Cefixime      | G543S                 | 2.8%           | 0.7%    |
|               | mtrRp                 | 4.5%           | 1.0%    |
|               | G120                  | 7.1%           | 0.8%    |
|               | PonA                  | 6.0%           | 0.9%    |
|               | A311V                 | 39.7%          | 4.0%    |
|               | A501P                 | 46.9%          | 5.7%    |
|               | A501T                 | 15.9%          | 1.0%    |
|               | A501V                 | 16.4%          | 1.3%    |
|               | N513Y                 | 27.8%          | 1.4%    |
| Azithromycin  | A517G                 | 4.5%           | 1.3%    |
|               | A2059G                | 12.1%          | 0.7%    |
|               | C2611T                | 6.6%           | 0.1%    |
|               | mtrRp_MEN             | 18.0%          | 0.7%    |
|               | mtrRp_WHO-P           | 25.3%          | 4.7%    |
|               | mtrRp-35Adel          | 4.1%           | 0.6%    |
|               | ermB                  | 12.3%          | 2.7%    |
|               | ermC                  | 15.5%          | 2.1%    |
|               | A39T                  | 2.1%           | 0.5%    |
|               | G120                  | 2.7%           | 0.5%    |
| Ciprofloxacin | PonA                  | 1.3%           | 0.7%    |
|               | gyrA_S91              | 16.1%          | 0.5%    |
|               | parC_D86              | 14.4%          | 0.5%    |
|               | parC_S87R             | 16.1%          | 0.5%    |
|               | parC_S87I             | 11.9%          | 1.1%    |
|               | parC_S87C             | 16.9%          | 2.2%    |
|               | parC_S87N             | 5.1%           | 0.8%    |
|               | parC_S88              | 4.1%           | 0.4%    |
| Penicillin    | parC_E91              | 15.4%          | 0.5%    |
|               | BLA                   | 50.0%          | 1.7%    |
|               | mtrRp                 | 4.3%           | 0.9%    |
|               | G120                  | 10.5%          | 0.7%    |
|               | PonA                  | 12.1%          | 0.8%    |
|               | N513Y                 | 9.8%           | 1.3%    |
|               | A517G                 | 10.0%          | 1.2%    |
| Tetracycline  | G543S                 | 3.3%           | 1.0%    |
|               | mtrRp_any             | 7.6%           | 0.8%    |
|               | A39T                  | 3.2%           | 0.8%    |
|               | G120                  | 9.7%           | 0.9%    |
|               | A121                  | 2.6%           | 0.8%    |
|               | rpsJ                  | 25.9%          | 1.3%    |
| Tetracycline  | tetM                  | 50.9%          | 0.9%    |
